# Supplementary material for: Health Care Providers’ Perspective and Knowledge about Peri-Surgical Medication and Practices in Breastfeeding Women
Source: MDPI journal article supplement (doi:10.3390/ijerph20043379), 2023-02-15
Supplement: s1 [file s1]

## Supplementary Material

**Table S1:** General questions on medication use and prescribing/dispensing practices for breastfeeding women. Data shown as number (%).

[illegible]

**Table S2:** Medication-specific knowledge about compatibility of analgesics used during (surgical) procedures in breastfeeding women. Correct answer (when clear advice) is underlined. Data shown as number (%).

|               |                  | I never dispense/work with this medicine | This medicine is contra-indicated, so I advise to cessate breastfeeding | This medicine is contra-indicated, so I dispense/work with another medicine | This medicine is compatible | I do not know, I need to look it up |
|---------------|------------------|------------------------------------------|-------------------------------------------------------------------------|-----------------------------------------------------------------------------|-----------------------------|-------------------------------------|
| Analgesics    |                  |                                          |                                                                         |                                                                             |                             |                                     |
| Paracetamol   | SP (89)          | 0 (0.0%)                                 | 0 (0.0%)                                                                | 0 (0.0%)                                                                    | 89 (100.0%)                 | 0 (0.0%)                            |
|               | Pharmacists (54) | 1 (1.9%)                                 | 0 (0.0%)                                                                | 0 (0.0%)                                                                    | 53 (98.1%)                  | 0 (0.0%)                            |
|               | GPs (20)         | 0 (0.0%)                                 | 0 (0.0%)                                                                | 0 (0.0%)                                                                    | 20 (100.0%)                 | 0 (0.0%)                            |
|               | Dentists (18)    | 4 (22.2%)                                | 0 (0.0%)                                                                | 0 (0.0%)                                                                    | 14 (77.8%)                  | 0 (0.0%)                            |
|               | Nurses (18)      | 0 (0.0%)                                 | 0 (0.0%)                                                                | 0 (0.0%)                                                                    | 16 (88.9%)                  | 2 (11.1%)                           |
|               | Midwives (92)    | 0 (0.0%)                                 | 0 (0.0%)                                                                | 0 (0.0%)                                                                    | 92 (100.0%)                 | 0 (0.0%)                            |
| Diclofenac    | All (291)        | 5 (1.7%)                                 | 0 (0.0%)                                                                | 0 (0.0%)                                                                    | <u>284 (97.6%)</u>          | 5 (0.7%)                            |
|               | SP (89)          | 13 (14.6%)                               | 0 (0.0%)                                                                | 4 (4.5%)                                                                    | 68 (76.4%)                  | 4 (4.5%)                            |
|               | Pharmacists (54) | 7 (13.0%)                                | 1 (1.9%)                                                                | 15 (27.8%)                                                                  | 29 (53.7%)                  | 2 (3.7%)                            |
|               | GPs (20)         | 6 (30.0%)                                | 0 (0.0%)                                                                | 8 (40.0%)                                                                   | 6 (30.0%)                   | 0 (0.0%)                            |
|               | Dentists (18)    | 9 (50.0%)                                | 0 (0.0%)                                                                | 3 (16.7%)                                                                   | 2 (11.1%)                   | 4 (22.2%)                           |
|               | Nurses (18)      | 2 (11.1%)                                | 0 (0.0%)                                                                | 4 (22.2%)                                                                   | 11 (61.1%)                  | 1 (5.6%)                            |
| Ibuprofen     | Midwives (92)    | 15 (16.3%)                               | 0 (0.0%)                                                                | 11 (12.0%)                                                                  | 56 (60.9%)                  | 10 (10.9%)                          |
|               | All (291)        | 52 (17.9%)                               | 1 (0.3%)                                                                | 45 (15.5%)                                                                  | <u>172 (59.1%)</u>          | 21 (7.2%)                           |
|               | SP (89)          | 7 (7.9%)                                 | 0 (0.0%)                                                                | 3 (3.4%)                                                                    | 75 (84.3%)                  | 4 (4.5%)                            |
|               | Pharmacists (54) | 5 (9.3%)                                 | 2 (3.7%)                                                                | 4 (7.4%)                                                                    | 42 (77.8%)                  | 1 (1.9%)                            |
|               | GPs (20)         | 4 (20.0%)                                | 0 (0.0%)                                                                | 3 (15.0%)                                                                   | 13 (65.0%)                  | 0 (0.0%)                            |
|               | Dentists (18)    | 6 (33.3%)                                | 0 (0.0%)                                                                | 3 (16.7%)                                                                   | 7 (38.9%)                   | 2 (11.1%)                           |
| Buprenorphine | Nurses (18)      | 2 (11.1%)                                | 0 (0.0%)                                                                | 2 (11.1%)                                                                   | 13 (72.2%)                  | 1 (5.6%)                            |
|               | Midwives (92)    | 1 (1.1%)                                 | 0 (0.0%)                                                                | 5 (5.4%)                                                                    | 85 (92.4%)                  | 1 (1.1%)                            |
|               | All (291)        | 25 (8.6%)                                | 2 (0.7%)                                                                | 20 (6.9%)                                                                   | <u>235 (80.8%)</u>          | 9 (3.1%)                            |
|               | SP (89)          | 25 (28.1%)                               | 5 (5.6%)                                                                | 12 (13.5%)                                                                  | 6 (6.7%)                    | 41 (46.1%)                          |
|               | Pharmacists (54) | 27 (50.0%)                               | 11 (20.4%)                                                              | 8 (14.8%)                                                                   | 6 (11.1%)                   | 2 (3.7%)                            |
|               | GPs (20)         | 7 (35.0%)                                | 1 (5.0%)                                                                | 9 (45.0%)                                                                   | 1 (5.0%)                    | 2 (10.0%)                           |
| Fentanyl      | Dentists (18)    | NA                                       | NA                                                                      | NA                                                                          | NA                          | NA                                  |
|               | Nurses (18)      | 10 (55.6%)                               | 0 (0.0%)                                                                | 3 (16.7%)                                                                   | 0 (0.0%)                    | 5 (27.8%)                           |
|               | Midwives (92)    | NA                                       | NA                                                                      | NA                                                                          | NA                          | NA                                  |
|               | All (163)        | 69 (42.3%)                               | 17 (10.4%)                                                              | 32 (19.6%)                                                                  | 13 (8.0%)                   | 50 (30.7%)                          |
|               | SP (89)          | 18 (20.2%)                               | 14 (15.7%)                                                              | 15 (16.9%)                                                                  | 14 (15.7%)                  | 28 (31.5%)                          |
|               | Pharmacists (54) | 24 (44.4%)                               | 13 (24.1%)                                                              | 9 (16.7%)                                                                   | 5 (9.3%)                    | 3 (5.6%)                            |
| Sufentanil    | GPs (20)         | 8 (40.0%)                                | 1 (5.0%)                                                                | 8 (40.0%)                                                                   | 2 (10.0%)                   | 1 (5.0%)                            |
|               | Dentists (18)    | NA                                       | NA                                                                      | NA                                                                          | NA                          | NA                                  |
|               | Nurses (18)      | 8 (44.4%)                                | 0 (0.0%)                                                                | 5 (27.8%)                                                                   | 0 (0.0%)                    | 5 (27.8%)                           |
|               | Midwives (92)    | NA                                       | NA                                                                      | NA                                                                          | NA                          | NA                                  |
|               | All (163)        | 58 (35.6%)                               | 28 (17.2%)                                                              | 37 (22.7%)                                                                  | 21 (12.9%)                  | 37 (22.7%)                          |
|               | SP (89)          | 17 (19.1%)                               | 16 (18.0%)                                                              | 4 (4.5%)                                                                    | 37 (41.6%)                  | 15 (16.9%)                          |
| Morphine      | Pharmacists (54) | 28 (51.9%)                               | 10 (18.5%)                                                              | 3 (5.6%)                                                                    | 0 (0.0%)                    | 13 (24.1%)                          |
|               | GPs (20)         | 7 (35.0%)                                | 0 (0.0%)                                                                | 2 (10.0%)                                                                   | 2 (10.0%)                   | 9 (45.0%)                           |
|               | Dentists (18)    | NA                                       | NA                                                                      | NA                                                                          | NA                          | NA                                  |
|               | Nurses (18)      | 7 (38.9%)                                | 0 (0.0%)                                                                | 3 (16.7%)                                                                   | 4 (22.2%)                   | 4 (22.2%)                           |
|               | Midwives (92)    | NA                                       | NA                                                                      | NA                                                                          | NA                          | NA                                  |
|               | All (163)        | 59 (36.2%)                               | 26 (16.0%)                                                              | 12 (7.4%)                                                                   | 43 (26.4%)                  | 41 (25.2%)                          |
| Codeine       | SP (89)          | 21 (23.6%)                               | 11 (12.4%)                                                              | 18 (20.2%)                                                                  | 12 (13.5%)                  | 27 (30.3%)                          |
|               | Pharmacists (54) | 21 (38.9%)                               | 17 (31.5%)                                                              | 10 (18.5%)                                                                  | 2 (3.7%)                    | 4 (7.4%)                            |
|               | GPs (20)         | 10 (50.0%)                               | 1 (5.0%)                                                                | 7 (35.0%)                                                                   | 0 (0.0%)                    | 2 (10.0%)                           |
|               | Dentists (18)    | NA                                       | NA                                                                      | NA                                                                          | NA                          | NA                                  |
|               | Nurses (18)      | 4 (22.2%)                                | 1 (5.6%)                                                                | 7 (38.9%)                                                                   | 2 (11.1%)                   | 4 (22.2%)                           |
|               | Midwives (92)    | NA                                       | NA                                                                      | NA                                                                          | NA                          | NA                                  |
| Codeine       | All (163)        | 56 (34.4%)                               | 30 (18.4%)                                                              | 42 (25.8%)                                                                  | 16 (9.8%)                   | 37 (22.7%)                          |
|               | SP (89)          | 15 (16.9%)                               | 8 (9.0%)                                                                | 28 (31.5%)                                                                  | 6 (6.7%)                    | 32 (36.0%)                          |
|               | Pharmacists (54) | 15 (27.8%)                               | 13 (24.1%)                                                              | 22 (40.7%)                                                                  | 1 (1.9%)                    | 3 (5.6%)                            |
|               | GPs (20)         | 7 (35.0%)                                | 2 (10.0%)                                                               | 8 (40.0%)                                                                   | 0 (0.0%)                    | 3 (15.0%)                           |
| Codeine       | Dentists (18)    | 6 (33.3%)                                | 0 (0.0%)                                                                | 7 (38.9%)                                                                   | 0 (0.0%)                    | 5 (27.8%)                           |

|             |                  |            |            |             |            |            |
|-------------|------------------|------------|------------|-------------|------------|------------|
| Tramadol    | Nurses (18)      | 5 (27.8%)  | 0 (0.0%)   | 8 (44.4%)   | 0 (0.0%)   | 5 (27.8%)  |
|             | Midwives (92)    | 17 (18.5%) | 0 (0.0%)   | 51 (55.4%)  | 2 (2.2%)   | 22 (23.9%) |
|             | All (291)        | 65 (22.3%) | 23 (7.9%)  | 124 (42.6%) | 9 (3.1%)   | 70 (24.1%) |
|             | SP (89)          | 15 (16.9%) | 9 (10.1%)  | 9 (10.1%)   | 46 (51.7%) | 10 (11.2%) |
|             | Pharmacists (54) | 20 (37.0%) | 12 (22.2%) | 12 (22.2%)  | 6 (11.1%)  | 4 (7.4%)   |
|             | GPs (20)         | 9 (45.0%)  | 1 (5.0%)   | 8 (40.0%)   | 2 (10.0%)  | 0 (0.0%)   |
|             | Dentists (18)    | 5 (27.8%)  | 0 (0.0%)   | 6 (33.3%)   | 1 (5.6%)   | 6 (33.3%)  |
| Oxycodone   | Nurses (18)      | 5 (27.8%)  | 0 (0.0%)   | 5 (27.8%)   | 5 (27.8%)  | 3 (16.7%)  |
|             | Midwives (92)    | 23 (25.0%) | 0 (0.0%)   | 27 (29.3%)  | 23 (25.0%) | 19 (20.7%) |
|             | All (291)        | 77 (26.5%) | 22 (7.6%)  | 67 (23.0%)  | 83 (28.5%) | 42 (14.4%) |
|             | SP (89)          | 16 (18.0%) | 10 (11.2%) | 28 (31.5%)  | 7 (7.9%)   | 28 (31.5%) |
|             | Pharmacists (54) | 23 (42.6%) | 15 (27.8%) | 11 (20.4%)  | 1 (1.9%)   | 4 (7.4%)   |
|             | GPs (20)         | 8 (40.0%)  | 1 (5.0%)   | 9 (45.0%)   | 0 (0.0%)   | 2 (10.0%)  |
|             | Dentists (18)    | NA         | NA         | NA          | NA         | NA         |
| Piritramide | Nurses (18)      | 7 (38.9%)  | 0 (0.0%)   | 6 (33.3%)   | 0 (0.0%)   | 5 (27.8%)  |
|             | Midwives (92)    | NA         | NA         | NA          | NA         | NA         |
|             | All (181)        | 54 (29.8%) | 26 (14.4%) | 54 (29.8%)  | 8 (4.4%)   | 39 (21.5%) |
|             | SP (89)          | 17 (19.1%) | 15 (16.9%) | 15 (16.9%)  | 30 (33.7%) | 12 (13.5%) |
|             | Pharmacists (54) | 26 (48.1%) | 10 (18.5%) | 7 (13.0%)   | 1 (1.9%)   | 10 (18.5%) |
|             | GPs (20)         | 7 (35.0%)  | 1 (5.0%)   | 5 (25.0%)   | 1 (5.0%)   | 6 (30.0%)  |
|             | Dentists (18)    | NA         | NA         | NA          | NA         | NA         |
|             | Nurses (18)      | 4 (22.2%)  | 1 (5.6%)   | 8 (44.4%)   | 1 (5.6%)   | 4 (22.2%)  |
|             | Midwives (92)    | NA         | NA         | NA          | NA         | NA         |
|             | All (181)        | 54 (29.8%) | 27 (14.9%) | 35 (19.3%)  | 33 (18.2%) | 32 (17.7%) |

GP: General Practitioner; NA: Not Assessed; SP: Specialty Physician

**Table S3:** Medication-specific knowledge about compatibility of adjuvants used during (surgical) procedures in breastfeeding women. Correct answer (when clear advice) is underlined. Data shown as number (%).

|               |                  | I never dispense/work with this medicine | This medicine is contra-indicated, so I advise to cessate breastfeeding | This medicine is contra-indicated, so I dispense/work with another medicine | This medicine is compatible | I do not know, I need to look it up |
|---------------|------------------|------------------------------------------|-------------------------------------------------------------------------|-----------------------------------------------------------------------------|-----------------------------|-------------------------------------|
| Adjuvants     |                  |                                          |                                                                         |                                                                             |                             |                                     |
| Atracurium    | SP (89)          | 15 (16.9%)                               | 2 (2.2%)                                                                | 0 (0.0%)                                                                    | 38 (42.7%)                  | 34 (38.2%)                          |
|               | Pharmacists (54) | 28 (51.9%)                               | 2 (3.7%)                                                                | 0 (0.0%)                                                                    | 2 (3.7%)                    | 22 (40.7%)                          |
|               | GPs (20)         | NA                                       | NA                                                                      | NA                                                                          | NA                          | NA                                  |
|               | Dentists (18)    | NA                                       | NA                                                                      | NA                                                                          | NA                          | NA                                  |
|               | Nurses (18)      | 10 (55.6%)                               | 0 (0.0%)                                                                | 0 (0.0%)                                                                    | 1 (5.6%)                    | 7 (38.9%)                           |
|               | Midwives (92)    | NA                                       | NA                                                                      | NA                                                                          | NA                          | NA                                  |
| Rocuronium    | All (161)        | 53 (32.9%)                               | 4 (2.5%)                                                                | 0 (0.0%)                                                                    | 41 (25.5%)                  | 63 (39.1%)                          |
|               | SP (89)          | 14 (15.7%)                               | 3 (3.4%)                                                                | 0 (0.0%)                                                                    | 54 (60.7%)                  | 18 (20.2%)                          |
|               | Pharmacists (54) | 28 (51.9%)                               | 1 (1.9%)                                                                | 0 (0.0%)                                                                    | 2 (3.7%)                    | 23 (42.6%)                          |
|               | GPs (20)         | NA                                       | NA                                                                      | NA                                                                          | NA                          | NA                                  |
|               | Dentists (18)    | NA                                       | NA                                                                      | NA                                                                          | NA                          | NA                                  |
|               | Nurses (18)      | 7 (38.9%)                                | 0 (0.0%)                                                                | 1 (5.6%)                                                                    | 3 (16.7%)                   | 7 (38.9%)                           |
| Cisatracurium | Midwives (92)    | NA                                       | NA                                                                      | NA                                                                          | NA                          | NA                                  |
|               | All (161)        | 49 (30.4%)                               | 4 (2.5%)                                                                | 1 (0.6%)                                                                    | 59 (36.6%)                  | 48 (29.8%)                          |
|               | SP (89)          | 14 (15.7%)                               | 2 (2.2%)                                                                | 1 (1.1%)                                                                    | 48 (53.9%)                  | 24 (27.0%)                          |
|               | Pharmacists (54) | 28 (51.9%)                               | 2 (3.7%)                                                                | 0 (0.0%)                                                                    | 2 (3.7%)                    | 22 (40.7%)                          |
|               | GPs (20)         | NA                                       | NA                                                                      | NA                                                                          | NA                          | NA                                  |
|               | Dentists (18)    | NA                                       | NA                                                                      | NA                                                                          | NA                          | NA                                  |
| Clonidine     | Nurses (18)      | 8 (44.4%)                                | 1 (5.6%)                                                                | 1 (5.6%)                                                                    | 2 (11.1%)                   | 6 (33.3%)                           |
|               | Midwives (92)    | NA                                       | NA                                                                      | NA                                                                          | NA                          | NA                                  |
|               | All (161)        | 50 (31.1%)                               | 5 (3.1%)                                                                | 2 (1.2%)                                                                    | 52 (32.3%)                  | 52 (32.3%)                          |
|               | SP (89)          | 34 (38.2%)                               | 2 (2.2%)                                                                | 8 (9.0%)                                                                    | 18 (20.2%)                  | 27 (30.3%)                          |
|               | Pharmacists (54) | 37 (68.5%)                               | 4 (7.4%)                                                                | 6 (11.1%)                                                                   | 1 (1.9%)                    | 6 (11.1%)                           |
|               | GPs (20)         | NA                                       | NA                                                                      | NA                                                                          | NA                          | NA                                  |
| Propofol      | Dentists (18)    | NA                                       | NA                                                                      | NA                                                                          | NA                          | NA                                  |
|               | Nurses (18)      | 9 (50.0%)                                | 0 (0.0%)                                                                | 0 (0.0%)                                                                    | 2 (11.1%)                   | 7 (38.9%)                           |
|               | Midwives (92)    | NA                                       | NA                                                                      | NA                                                                          | NA                          | NA                                  |
|               | All (161)        | 80 (49.7%)                               | 6 (3.7%)                                                                | 14 (8.7%)                                                                   | 21 (13.0%)                  | 40 (24.8%)                          |
|               | SP (89)          | 12 (13.5%)                               | 5 (5.6%)                                                                | 0 (0.0%)                                                                    | 55 (61.8%)                  | 17 (19.1%)                          |
|               | Pharmacists (54) | 26 (48.1%)                               | 3 (5.6%)                                                                | 1 (1.9%)                                                                    | 2 (3.7%)                    | 22 (40.7%)                          |
| Ketamine      | GPs (20)         | NA                                       | NA                                                                      | NA                                                                          | NA                          | NA                                  |
|               | Dentists (18)    | NA                                       | NA                                                                      | NA                                                                          | NA                          | NA                                  |
|               | Nurses (18)      | 8 (44.4%)                                | 0 (0.0%)                                                                | 3 (16.7%)                                                                   | 1 (5.6%)                    | 6 (33.3%)                           |
|               | Midwives (92)    | NA                                       | NA                                                                      | NA                                                                          | NA                          | NA                                  |
|               | All (161)        | 46 (28.6%)                               | 8 (5.0%)                                                                | 2 (1.2%)                                                                    | 59 (36.6%)                  | 46 (28.6%)                          |
|               | SP (89)          | 29 (32.6%)                               | 5 (5.6%)                                                                | 9 (10.1%)                                                                   | 20 (22.5%)                  | 26 (29.2%)                          |
| Midazolam     | Pharmacists (54) | 23 (42.6%)                               | 5 (9.3%)                                                                | 5 (9.3%)                                                                    | 0 (0.0%)                    | 21 (38.9%)                          |
|               | GPs (20)         | NA                                       | NA                                                                      | NA                                                                          | NA                          | NA                                  |
|               | Dentists (18)    | NA                                       | NA                                                                      | NA                                                                          | NA                          | NA                                  |
|               | Nurses (18)      | 8 (44.4%)                                | 0 (0.0%)                                                                | 3 (16.7%)                                                                   | 1 (5.6%)                    | 6 (33.3%)                           |
|               | Midwives (92)    | NA                                       | NA                                                                      | NA                                                                          | NA                          | NA                                  |
|               | All (161)        | 60 (37.3%)                               | 10 (6.2%)                                                               | 17 (10.6%)                                                                  | 21 (13.0%)                  | 53 (32.9%)                          |
|               | SP (89)          | 22 (24.7%)                               | 6 (6.7%)                                                                | 11 (12.4%)                                                                  | 27 (30.3%)                  | 23 (25.8%)                          |
|               | Pharmacists (54) | 27 (50.0%)                               | 7 (13.0%)                                                               | 3 (5.6%)                                                                    | 1 (1.9%)                    | 16 (29.6%)                          |
|               | GPs (20)         | NA                                       | NA                                                                      | NA                                                                          | NA                          | NA                                  |
|               | Dentists (18)    | NA                                       | NA                                                                      | NA                                                                          | NA                          | NA                                  |
|               | Nurses (18)      | 8 (44.4%)                                | 0 (0.0%)                                                                | 2 (11.1%)                                                                   | 1 (5.6%)                    | 7 (38.9%)                           |
|               | Midwives (92)    | NA                                       | NA                                                                      | NA                                                                          | NA                          | NA                                  |
|               | All (161)        | 57 (35.4%)                               | 13 (8.1%)                                                               | 16 (9.9%)                                                                   | 29 (18.0%)                  | 46 (28.6%)                          |

GP: General Practitioner; NA: Not Assessed; SP: Specialty Physician

**Table S4:** Medication-specific knowledge about compatibility of Antiaggregants and anticoagulants used during (surgical) procedures in breastfeeding women. Correct answer (when clear advice) is underlined. Data shown as number (%).

|                                                             |                  | I never dispense/work with this medicine | This medicine is contra-indicated, so I advise to cessate breastfeeding | This medicine is contra-indicated, so I dispense/work with another medicine | This medicine is compatible | I do not know, I need to look it up |
|-------------------------------------------------------------|------------------|------------------------------------------|-------------------------------------------------------------------------|-----------------------------------------------------------------------------|-----------------------------|-------------------------------------|
| Antiaggregants and anticoagulants                           |                  |                                          |                                                                         |                                                                             |                             |                                     |
| Acetylsalicylic acid as antiaggregant (30 à 100 mg per day) | SP (89)          | 23 (25.8%)                               | 0 (0.0%)                                                                | 3 (3.4%)                                                                    | 55 (61.8%)                  | 8 (9.0%)                            |
|                                                             | Pharmacists (54) | 15 (27.8%)                               | 2 (3.7%)                                                                | 9 (16.7%)                                                                   | 26 (48.1%)                  | 2 (3.7%)                            |
|                                                             | GPs (20)         | 8 (40.0%)                                | 2 (10.0%)                                                               | 2 (10.0%)                                                                   | 7 (35.0%)                   | 1 (5.0%)                            |
|                                                             | Dentists (18)    | 6 (33.3%)                                | 0 (0.0%)                                                                | 0 (0.0%)                                                                    | 3 (16.7%)                   | 9 (50.0%)                           |
|                                                             | Nurses (18)      | 8 (44.4%)                                | 0 (0.0%)                                                                | 2 (11.1%)                                                                   | 5 (27.8%)                   | 3 (16.7%)                           |
|                                                             | Midwives (92)    | 41 (44.6%)                               | 0 (0.0%)                                                                | 9 (9.8%)                                                                    | 27 (29.3%)                  | 15 (16.3%)                          |
| Heparine                                                    | All (291)        | 101 (34.7%)                              | 4 (1.4%)                                                                | 25 (8.6%)                                                                   | <u>123 (42.3%)</u>          | 38 (13.1%)                          |
|                                                             | SP (89)          | 38 (42.7%)                               | 2 (2.2%)                                                                | 2 (2.2%)                                                                    | 37 (41.6%)                  | 10 (11.2%)                          |
|                                                             | Pharmacists (54) | 21 (38.9%)                               | 0 (0.0%)                                                                | 2 (3.7%)                                                                    | 29 (53.7%)                  | 2 (3.7%)                            |
|                                                             | GPs (20)         | 13 (65.0%)                               | 0 (0.0%)                                                                | 1 (5.0%)                                                                    | 4 (20.0%)                   | 2 (10.0%)                           |
|                                                             | Dentists (18)    | 6 (33.3%)                                | 0 (0.0%)                                                                | 1 (5.6%)                                                                    | 0 (0.0%)                    | 11 (61.1%)                          |
|                                                             | Nurses (18)      | 10 (55.6%)                               | 0 (0.0%)                                                                | 0 (0.0%)                                                                    | 5 (27.8%)                   | 3 (16.7%)                           |
| Nadroparine                                                 | Midwives (92)    | 53 (57.6%)                               | 0 (0.0%)                                                                | 3 (3.3%)                                                                    | 23 (25.0%)                  | 13 (14.1%)                          |
|                                                             | All (291)        | 141 (48.5%)                              | 2 (0.7%)                                                                | 9 (3.1%)                                                                    | <u>98 (33.7%)</u>           | 41 (14.1%)                          |
|                                                             | SP (89)          | 19 (21.3%)                               | 1 (1.1%)                                                                | 1 (1.1%)                                                                    | 63 (70.8%)                  | 5 (5.6%)                            |
|                                                             | Pharmacists (54) | 20 (37.0%)                               | 0 (0.0%)                                                                | 3 (5.6%)                                                                    | 30 (55.6%)                  | 1 (1.9%)                            |
|                                                             | GPs (20)         | 11 (55.0%)                               | 0 (0.0%)                                                                | 1 (5.0%)                                                                    | 7 (35.0%)                   | 1 (5.0%)                            |
|                                                             | Dentists (18)    | 6 (33.3%)                                | 0 (0.0%)                                                                | 0 (0.0%)                                                                    | 0 (0.0%)                    | 12 (66.7%)                          |
| Enoxaparine                                                 | Nurses (18)      | 6 (33.3%)                                | 0 (0.0%)                                                                | 0 (0.0%)                                                                    | 10 (55.6%)                  | 2 (11.1%)                           |
|                                                             | Midwives (92)    | 15 (16.3%)                               | 0 (0.0%)                                                                | 0 (0.0%)                                                                    | 73 (79.3%)                  | 4 (4.3%)                            |
|                                                             | All (291)        | 77 (26.5%)                               | 1 (0.3%)                                                                | 5 (1.7%)                                                                    | <u>183 (62.9%)</u>          | 25 (8.6%)                           |
|                                                             | SP (89)          | 14 (15.7%)                               | 1 (1.1%)                                                                | 0 (0.0%)                                                                    | 71 (79.8%)                  | 3 (3.4%)                            |
|                                                             | Pharmacists (54) | 18 (33.3%)                               | 0 (0.0%)                                                                | 1 (1.9%)                                                                    | 34 (63.0%)                  | 1 (1.9%)                            |
|                                                             | GPs (20)         | 10 (50.0%)                               | 0 (0.0%)                                                                | 1 (5.0%)                                                                    | 8 (40.0%)                   | 1 (5.0%)                            |
|                                                             | Dentists (18)    | 6 (33.3%)                                | 0 (0.0%)                                                                | 0 (0.0%)                                                                    | 0 (0.0%)                    | 12 (66.7%)                          |
|                                                             | Nurses (18)      | 6 (33.3%)                                | 0 (0.0%)                                                                | 0 (0.0%)                                                                    | 10 (55.6%)                  | 2 (11.1%)                           |
|                                                             | Midwives (92)    | 9 (9.8%)                                 | 0 (0.0%)                                                                | 0 (0.0%)                                                                    | 80 (87.0%)                  | 3 (3.3%)                            |
|                                                             | All (291)        | 63 (21.6%)                               | 1 (0.3%)                                                                | 2 (0.7%)                                                                    | <u>203 (69.8%)</u>          | 22 (7.6%)                           |

GP: General Practitioner; NA: Not Assessed; SP: Specialty Physician

**Table S5:** Medication-specific knowledge about compatibility of antibiotics used during (surgical) procedures in breastfeeding women. Correct answer (when clear advice) is underlined. Data shown as number (%).

|                               |                  | I never dispense/work with this medicine | This medicine is contra-indicated, so I advise to cessate breastfeeding | This medicine is contra-indicated, so I dispense/work with another medicine | This medicine is compatible | I do not know, I need to look it up |
|-------------------------------|------------------|------------------------------------------|-------------------------------------------------------------------------|-----------------------------------------------------------------------------|-----------------------------|-------------------------------------|
| Antibiotics                   |                  |                                          |                                                                         |                                                                             |                             |                                     |
| Amoxicillin                   | SP (89)          | 15 (16.9%)                               | 0 (0.0%)                                                                | 1 (1.1%)                                                                    | 72 (80.9%)                  | 1 (1.1%)                            |
|                               | Pharmacists (54) | 1 (1.9%)                                 | 2 (3.7%)                                                                | 0 (0.0%)                                                                    | 51 (94.4%)                  | 0 (0.0%)                            |
|                               | GPs (20)         | 1 (5.0%)                                 | 0 (0.0%)                                                                | 0 (0.0%)                                                                    | 19 (95.0%)                  | 0 (0.0%)                            |
|                               | Dentists (18)    | 3 (16.7%)                                | 0 (0.0%)                                                                | 2 (11.1%)                                                                   | 13 (72.2%)                  | 0 (0.0%)                            |
|                               | Nurses (18)      | 3 (16.7%)                                | 1 (5.6%)                                                                | 0 (0.0%)                                                                    | 13 (72.2%)                  | 1 (5.6%)                            |
|                               | Midwives (92)    | 7 (7.6%)                                 | 0 (0.0%)                                                                | 0 (0.0%)                                                                    | 79 (85.9%)                  | 6 (6.5%)                            |
| Amoxicillin + clavulanic acid | All (291)        | 30 (10.3%)                               | 3 (1.0%)                                                                | 3 (1.0%)                                                                    | <u>247 (84.9%)</u>          | 8 (2.7%)                            |
|                               | SP (89)          | 20 (22.5%)                               | 1 (1.1%)                                                                | 6 (6.7%)                                                                    | 61 (68.5%)                  | 1 (1.1%)                            |
|                               | Pharmacists (54) | 8 (14.8%)                                | 2 (3.7%)                                                                | 7 (13.0%)                                                                   | 37 (68.5%)                  | 0 (0.0%)                            |
|                               | GPs (20)         | 4 (20.0%)                                | 1 (5.0%)                                                                | 1 (5.0%)                                                                    | 14 (70.0%)                  | 0 (0.0%)                            |
|                               | Dentists (18)    | 6 (33.3%)                                | 0 (0.0%)                                                                | 2 (11.1%)                                                                   | 8 (44.4%)                   | 2 (11.1%)                           |
|                               | Nurses (18)      | 5 (27.8%)                                | 1 (5.6%)                                                                | 0 (0.0%)                                                                    | 11 (61.1%)                  | 1 (5.6%)                            |
| Cefazolin                     | Midwives (92)    | 9 (9.8%)                                 | 0 (0.0%)                                                                | 3 (3.3%)                                                                    | 75 (81.5%)                  | 5 (5.4%)                            |
|                               | All (291)        | 52 (17.9%)                               | 5 (1.7%)                                                                | 19 (6.5%)                                                                   | <u>206 (70.8%)</u>          | 9 (3.1%)                            |
|                               | SP (89)          | 18 (20.2%)                               | 1 (1.1%)                                                                | 1 (1.1%)                                                                    | 68 (76.4%)                  | 1 (1.1%)                            |
|                               | Pharmacists (54) | 38 (70.4%)                               | 1 (1.9%)                                                                | 1 (1.9%)                                                                    | 8 (14.8%)                   | 6 (11.1%)                           |
|                               | GPs (20)         | 11 (55.0%)                               | 0 (0.0%)                                                                | 1 (5.0%)                                                                    | 5 (25.0%)                   | 3 (15.0%)                           |
|                               | Dentists (18)    | NA                                       | NA                                                                      | NA                                                                          | NA                          | NA                                  |
| Clarithromycin                | Nurses (18)      | 7 (38.9%)                                | 1 (5.6%)                                                                | 0 (0.0%)                                                                    | 9 (50.0%)                   | 1 (5.6%)                            |
|                               | Midwives (92)    | 47 (51.1%)                               | 0 (0.0%)                                                                | 2 (2.2%)                                                                    | 33 (35.9%)                  | 10 (10.9%)                          |
|                               | All (273)        | 121 (44.3%)                              | 3 (1.1%)                                                                | 5 (1.8%)                                                                    | <u>123 (45.1%)</u>          | 21 (7.7%)                           |
|                               | SP (89)          | 43 (48.3%)                               | 2 (2.2%)                                                                | 6 (6.7%)                                                                    | 32 (36.0%)                  | 6 (6.7%)                            |
|                               | Pharmacists (54) | 35 (64.8%)                               | 2 (3.7%)                                                                | 4 (7.4%)                                                                    | 13 (24.1%)                  | 0 (0.0%)                            |
|                               | GPs (20)         | 11 (55.0%)                               | 0 (0.0%)                                                                | 3 (15.0%)                                                                   | 6 (30.0%)                   | 0 (0.0%)                            |
| Clindamycin                   | Dentists (18)    | 8 (44.4%)                                | 0 (0.0%)                                                                | 4 (22.2%)                                                                   | 3 (16.7%)                   | 3 (16.7%)                           |
|                               | Nurses (18)      | 11 (61.1%)                               | 1 (5.6%)                                                                | 0 (0.0%)                                                                    | 3 (16.7%)                   | 3 (16.7%)                           |
|                               | Midwives (92)    | 65 (70.7%)                               | 0 (0.0%)                                                                | 3 (3.3%)                                                                    | 13 (14.1%)                  | 11 (12.0%)                          |
|                               | All (291)        | 173 (59.5%)                              | 5 (1.7%)                                                                | 20 (6.9%)                                                                   | <u>70 (24.1%)</u>           | 23 (7.9%)                           |
|                               | SP (89)          | 39 (43.8%)                               | 2 (2.2%)                                                                | 5 (5.6%)                                                                    | 40 (44.9%)                  | 3 (3.4%)                            |
|                               | Pharmacists (54) | 35 (64.8%)                               | 2 (3.7%)                                                                | 5 (9.3%)                                                                    | 11 (20.4%)                  | 1 (1.9%)                            |
|                               | GPs (20)         | 15 (75.0%)                               | 0 (0.0%)                                                                | 2 (10.0%)                                                                   | 3 (15.0%)                   | 0 (0.0%)                            |
|                               | Dentists (18)    | 9 (50.0%)                                | 0 (0.0%)                                                                | 3 (16.7%)                                                                   | 5 (27.8%)                   | 1 (5.6%)                            |
|                               | Nurses (18)      | 7 (38.9%)                                | 1 (5.6%)                                                                | 0 (0.0%)                                                                    | 8 (44.4%)                   | 2 (11.1%)                           |
|                               | Midwives (92)    | 39 (42.4%)                               | 0 (0.0%)                                                                | 2 (2.2%)                                                                    | 41 (44.6%)                  | 10 (10.9%)                          |
|                               | All (291)        | 144 (49.5%)                              | 5 (1.7%)                                                                | 17 (5.8%)                                                                   | <u>108 (37.1%)</u>          | 17 (5.8%)                           |

GP: General Practitioner; NA: Not Assessed; SP: Specialty Physician

**Table S6:** Medication-specific knowledge about compatibility of (local) anesthetics used during (surgical) procedures in breastfeeding women. Correct answer (when clear advice) is underlined. Data shown as number (%).

|                      |                  | I never dispense/work with this medicine | This medicine is contra-indicated, so I advise to cessate breastfeeding | This medicine is contra-indicated, so I dispense/work with another medicine | This medicine is compatible | I do not know, I need to look it up |
|----------------------|------------------|------------------------------------------|-------------------------------------------------------------------------|-----------------------------------------------------------------------------|-----------------------------|-------------------------------------|
| (Local) anaesthetics |                  |                                          |                                                                         |                                                                             |                             |                                     |
| Lidocaine            | SP (89)          | 7 (7.9%)                                 | 0 (0.0%)                                                                | 0 (0.0%)                                                                    | 78 (87.6%)                  | 4 (4.5%)                            |
|                      | Pharmacists (54) | 31 (57.4%)                               | 1 (1.9%)                                                                | 1 (1.9%)                                                                    | 19 (35.2%)                  | 2 (3.7%)                            |
|                      | GPs (20)         | NA                                       | NA                                                                      | NA                                                                          | NA                          | NA                                  |
|                      | Dentists (18)    | 2 (11.1%)                                | 1 (5.6%)                                                                | 0 (0.0%)                                                                    | 13 (72.2%)                  | 2 (11.1%)                           |
|                      | Nurses (18)      | 4 (22.2%)                                | 0 (0.0%)                                                                | 0 (0.0%)                                                                    | 12 (66.7%)                  | 2 (11.1%)                           |
|                      | Midwives (92)    | 32 (34.8%)                               | 0 (0.0%)                                                                | 1 (1.1%)                                                                    | 43 (46.7%)                  | 16 (17.4%)                          |
| Bupivacaine          | All (271)        | <b>76 (28.0%)</b>                        | <b>2 (0.7%)</b>                                                         | <b>2 (0.7%)</b>                                                             | <b><u>165 (60.9%)</u></b>   | <b><u>26 (9.6%)</u></b>             |
|                      | SP (89)          | 12 (13.5%)                               | 0 (0.0%)                                                                | 0 (0.0%)                                                                    | 65 (73.0%)                  | 12 (13.5%)                          |
|                      | Pharmacists (54) | 32 (59.3%)                               | 1 (1.9%)                                                                | 0 (0.0%)                                                                    | 6 (11.1%)                   | 15 (27.8%)                          |
|                      | GPs (20)         | NA                                       | NA                                                                      | NA                                                                          | NA                          | NA                                  |
|                      | Dentists (18)    | 7 (38.9%)                                | 0 (0.0%)                                                                | 1 (5.6%)                                                                    | 2 (11.1%)                   | 8 (44.4%)                           |
|                      | Nurses (18)      | 9 (50.0%)                                | 0 (0.0%)                                                                | 0 (0.0%)                                                                    | 5 (27.8%)                   | 4 (22.2%)                           |
| Levobupivacaine      | Midwives (92)    | 50 (54.3%)                               | 0 (0.0%)                                                                | 1 (1.1%)                                                                    | 24 (26.1%)                  | 17 (18.5%)                          |
|                      | All (271)        | <b>110 (40.6%)</b>                       | <b>1 (0.4%)</b>                                                         | <b>2 (0.7%)</b>                                                             | <b><u>102 (37.6%)</u></b>   | <b><u>56 (20.7%)</u></b>            |
|                      | SP (89)          | 13 (14.6%)                               | 0 (0.0%)                                                                | 0 (0.0%)                                                                    | 59 (66.3%)                  | 17 (19.1%)                          |
|                      | Pharmacists (54) | 32 (59.3%)                               | 1 (1.9%)                                                                | 0 (0.0%)                                                                    | 4 (7.4%)                    | 17 (31.5%)                          |
|                      | GPs (20)         | NA                                       | NA                                                                      | NA                                                                          | NA                          | NA                                  |
|                      | Dentists (18)    | NA                                       | NA                                                                      | NA                                                                          | NA                          | NA                                  |
| Ropivacaine          | Nurses (18)      | 9 (50.0%)                                | 0 (0.0%)                                                                | 0 (0.0%)                                                                    | 5 (27.8%)                   | 4 (22.2%)                           |
|                      | Midwives (92)    | 60 (65.2%)                               | 0 (0.0%)                                                                | 1 (1.1%)                                                                    | 13 (14.1%)                  | 18 (19.6%)                          |
|                      | All (271)        | <b>114 (42.1%)</b>                       | <b>1 (0.4%)</b>                                                         | <b>1 (0.4%)</b>                                                             | <b><u>81 (29.9%)</u></b>    | <b><u>56 (20.7%)</u></b>            |
|                      | SP (89)          | 15 (16.9%)                               | 0 (0.0%)                                                                | 0 (0.0%)                                                                    | 62 (69.7%)                  | 12 (13.5%)                          |
|                      | Pharmacists (54) | 31 (57.4%)                               | 1 (1.9%)                                                                | 0 (0.0%)                                                                    | 4 (7.4%)                    | 18 (33.3%)                          |
|                      | GPs (20)         | NA                                       | NA                                                                      | NA                                                                          | NA                          | NA                                  |
| Desflurane           | Dentists (18)    | 7 (38.9%)                                | 0 (0.0%)                                                                | 1 (5.6%)                                                                    | 1 (5.6%)                    | 9 (50.0%)                           |
|                      | Nurses (18)      | 10 (55.6%)                               | 0 (0.0%)                                                                | 1 (5.6%)                                                                    | 3 (16.7%)                   | 4 (22.2%)                           |
|                      | Midwives (92)    | 44 (47.8%)                               | 0 (0.0%)                                                                | 2 (2.2%)                                                                    | 29 (31.5%)                  | 17 (18.5%)                          |
|                      | All (271)        | <b>107 (39.5%)</b>                       | <b>1 (0.4%)</b>                                                         | <b>4 (1.5%)</b>                                                             | <b><u>99 (36.5%)</u></b>    | <b><u>60 (22.1%)</u></b>            |
|                      | SP (89)          | 17 (19.1%)                               | 5 (5.6%)                                                                | 2 (2.2%)                                                                    | 40 (44.9%)                  | 25 (28.1%)                          |
|                      | Pharmacists (54) | 30 (55.6%)                               | 3 (5.6%)                                                                | 0 (0.0%)                                                                    | 2 (3.7%)                    | 19 (35.2%)                          |
| Sevoflurane          | GPs (20)         | NA                                       | NA                                                                      | NA                                                                          | NA                          | NA                                  |
|                      | Dentists (18)    | NA                                       | NA                                                                      | NA                                                                          | NA                          | NA                                  |
|                      | Nurses (18)      | 11 (61.1%)                               | 0 (0.0%)                                                                | 0 (0.0%)                                                                    | 2 (11.1%)                   | 5 (27.8%)                           |
|                      | Midwives (92)    | NA                                       | NA                                                                      | NA                                                                          | NA                          | NA                                  |
|                      | All (161)        | <b>58 (36.0%)</b>                        | <b>8 (5.0%)</b>                                                         | <b>2 (1.2%)</b>                                                             | <b><u>44 (27.3%)</u></b>    | <b><u>49 (30.4%)</u></b>            |
|                      | SP (89)          | 11 (12.4%)                               | 6 (6.7%)                                                                | 0 (0.0%)                                                                    | 56 (62.9%)                  | 16 (18.0%)                          |
|                      | Pharmacists (54) | 30 (55.6%)                               | 3 (5.6%)                                                                | 0 (0.0%)                                                                    | 2 (3.7%)                    | 19 (35.2%)                          |
|                      | GPs (20)         | NA                                       | NA                                                                      | NA                                                                          | NA                          | NA                                  |
|                      | Dentists (18)    | NA                                       | NA                                                                      | NA                                                                          | NA                          | NA                                  |
|                      | Nurses (18)      | 10 (55.6%)                               | 0 (0.0%)                                                                | 1 (5.6%)                                                                    | 2 (11.1%)                   | 5 (27.8%)                           |
|                      | Midwives (92)    | NA                                       | NA                                                                      | NA                                                                          | NA                          | NA                                  |
|                      | All (161)        | <b>51 (31.7%)</b>                        | <b>9 (5.6%)</b>                                                         | <b>1 (0.6%)</b>                                                             | <b><u>60 (37.3%)</u></b>    | <b><u>40 (24.8%)</u></b>            |

GP: General Practitioner; NA: Not Assessed; SP: Specialty Physician

**Table S7:** Medication-specific knowledge about compatibility of antiemetics used during (surgical) procedures in breastfeeding women. Correct answer (when clear advice) is underlined. Data shown as number (%).

|                          |                  | I never dispense/work with this medicine | This medicine is contra-indicated, so I advise to cessate breastfeeding | This medicine is contra-indicated, so I dispense/work with another medicine | This medicine is compatible | I do not know, I need to look it up |
|--------------------------|------------------|------------------------------------------|-------------------------------------------------------------------------|-----------------------------------------------------------------------------|-----------------------------|-------------------------------------|
| Antiemetics              |                  |                                          |                                                                         |                                                                             |                             |                                     |
| Metoclopramide           | SP (89)          | 17 (19.1%)                               | 1 (1.1%)                                                                | 6 (6.7%)                                                                    | 55 (61.8%)                  | 10 (11.2%)                          |
|                          | Pharmacists (54) | 12 (22.2%)                               | 0 (0.0%)                                                                | 6 (11.1%)                                                                   | 36 (66.7%)                  | 0 (0.0%)                            |
|                          | GPs (20)         | 7 (35.0%)                                | 0 (0.0%)                                                                | 1 (5.0%)                                                                    | 12 (60.0%)                  | 0 (0.0%)                            |
|                          | Dentists (18)    | NA                                       | NA                                                                      | NA                                                                          | NA                          | NA                                  |
|                          | Nurses (18)      | 4 (22.2%)                                | 1 (5.6%)                                                                | 0 (0.0%)                                                                    | 12 (66.7%)                  | 1 (5.6%)                            |
|                          | Midwives (92)    | 19 (20.7%)                               | 0 (0.0%)                                                                | 2 (2.2%)                                                                    | 68 (73.9%)                  | 3 (3.3%)                            |
| Alizapride <sup>1</sup>  | All (273)        | 59 (21.6%)                               | 2 (0.7%)                                                                | 15 (5.5%)                                                                   | 183 (67.0%)                 | 14 (5.1%)                           |
|                          | SP (89)          | 23 (25.8%)                               | 0 (0.0%)                                                                | 6 (6.7%)                                                                    | 55 (61.8%)                  | 5 (5.6%)                            |
|                          | Pharmacists (54) | 35 (64.8%)                               | 1 (1.9%)                                                                | 12 (22.2%)                                                                  | 6 (11.1%)                   | 0 (0.0%)                            |
|                          | GPs (20)         | 14 (70.0%)                               | 0 (0.0%)                                                                | 3 (15.0%)                                                                   | 2 (10.0%)                   | 1 (5.0%)                            |
|                          | Dentists (18)    | NA                                       | NA                                                                      | NA                                                                          | NA                          | NA                                  |
|                          | Nurses (18)      | 4 (22.2%)                                | 1 (5.6%)                                                                | 1 (5.6%)                                                                    | 10 (55.6%)                  | 2 (11.1%)                           |
| Domperidone              | Midwives (92)    | 29 (31.5%)                               | 0 (0.0%)                                                                | 4 (4.3%)                                                                    | 54 (58.7%)                  | 5 (5.4%)                            |
|                          | All (273)        | 105 (38.5%)                              | 2 (0.7%)                                                                | 26 (9.5%)                                                                   | 127 (46.5%)                 | 13 (4.8%)                           |
|                          | SP (89)          | 33 (37.1%)                               | 2 (2.2%)                                                                | 9 (10.1%)                                                                   | 32 (36.0%)                  | 13 (14.6%)                          |
|                          | Pharmacists (54) | 6 (11.1%)                                | 1 (1.9%)                                                                | 11 (20.4%)                                                                  | 35 (64.8%)                  | 1 (1.9%)                            |
|                          | GPs (20)         | 7 (35.0%)                                | 0 (0.0%)                                                                | 6 (30.0%)                                                                   | 7 (35.0%)                   | 0 (0.0%)                            |
|                          | Dentists (18)    | NA                                       | NA                                                                      | NA                                                                          | NA                          | NA                                  |
| Ondansetron <sup>1</sup> | Nurses (18)      | 4 (22.2%)                                | 1 (5.6%)                                                                | 0 (0.0%)                                                                    | 12 (66.7%)                  | 1 (5.6%)                            |
|                          | Midwives (92)    | 10 (10.9%)                               | 0 (0.0%)                                                                | 5 (5.4%)                                                                    | 72 (78.3%)                  | 5 (5.4%)                            |
|                          | All (273)        | 60 (22.0%)                               | 4 (1.5%)                                                                | 31 (11.4%)                                                                  | 158 (57.9%)                 | 20 (7.3%)                           |
|                          | SP (89)          | 19 (21.3%)                               | 1 (2.2%)                                                                | 6 (6.7%)                                                                    | 59 (66.3%)                  | 4 (4.5%)                            |
|                          | Pharmacists (54) | 35 (64.8%)                               | 0 (0.0%)                                                                | 7 (13.0%)                                                                   | 3 (5.6%)                    | 9 (16.7%)                           |
|                          | GPs (20)         | 16 (80.0%)                               | 0 (0.0%)                                                                | 1 (5.0%)                                                                    | 0 (0.0%)                    | 3 (15.0%)                           |
| Droperidol <sup>1</sup>  | Dentists (18)    | NA                                       | NA                                                                      | NA                                                                          | NA                          | NA                                  |
|                          | Nurses (18)      | 6 (33.3%)                                | 1 (5.6%)                                                                | 2 (11.1%)                                                                   | 6 (33.3%)                   | 3 (16.7%)                           |
|                          | Midwives (92)    | 59 (64.1%)                               | 0 (0.0%)                                                                | 4 (4.3%)                                                                    | 15 (16.3%)                  | 14 (15.2%)                          |
|                          | All (273)        | 135 (49.5%)                              | 2 (0.7%)                                                                | 20 (7.3%)                                                                   | 83 (30.4%)                  | 33 (12.1%)                          |
|                          | SP (89)          | 36 (40.4%)                               | 3 (3.4%)                                                                | 17 (19.1%)                                                                  | 16 (18.0%)                  | 17 (19.1%)                          |
|                          | Pharmacists (54) | 30 (55.6%)                               | 2 (3.7%)                                                                | 5 (9.3%)                                                                    | 1 (1.9%)                    | 16 (29.6%)                          |
|                          | GPs (20)         | 15 (75.0%)                               | 0 (0.0%)                                                                | 1 (5.0%)                                                                    | 0 (0.0%)                    | 4 (20.0%)                           |
|                          | Dentists (18)    | NA                                       | NA                                                                      | NA                                                                          | NA                          | NA                                  |
|                          | Nurses (18)      | 11 (61.1%)                               | 0 (0.0%)                                                                | 1 (5.6%)                                                                    | 1 (5.6%)                    | 5 (27.8%)                           |
|                          | Midwives (92)    | 67 (72.8%)                               | 0 (0.0%)                                                                | 5 (5.4%)                                                                    | 3 (3.3%)                    | 17 (18.5%)                          |
|                          | All (273)        | 159 (58.2%)                              | 5 (1.2%)                                                                | 29 (10.6%)                                                                  | 21 (7.7%)                   | 59 (21.6%)                          |

<sup>1</sup> The risk of administration of this drug during breastfeeding is considered possible or unknown

GP: General Practitioner; NA: Not Assessed; SP: Specialty Physician
